# Supplementary material
Source: HighWire-hosted journal article supplement (https://care.diabetesjournals.org/content/suppl/2006/11/28/29.12.2638)
Supplement: PG2638OnlineAppendixRevised.pdf [file PG2638OnlineAppendixRevised.pdf]

## **On-Line Appendix**

Study investigators:

*Australia:* Carey D, D’Emden M, Graham J, Roberts A; *Austria:* Paulweber B, Toplak H, Winkler F; *Belgium:* Bacart P, Keymeulen B; *Brazil:* Suplicy HL; *Chile:* Godoy G, Moreno MI; *Denmark:* Christiansen CS, Hermansen K; *France:* Charbonnel B, Giral P, Valensi P; *Germany:* Derwahl KM, Drynda K, Kirchberg HG, Klausman G, Klein C, Oerter EM, Schell E, Schulze ED, Zoeller T; *Hong Kong:* Leung JYY, Tsang MW; *Israel:* Herskovits AT, Karasik A, Oren S; *Italy:* Cicconetti C, Di Alesio A, De Mattia G, Gambardella S; *Malaysia:* Pendek R, A.G. Sarvar MM; *Mexico:* Alpizar M, Arellano S; *Netherlands:* Costongs RJMG, Van Leendert RJM; *New Zealand:* Dunn P, Scott RS; *Norway:* Claudi T, Furuseth K; *Peru:* Arbañil H, Delgado Butrón C, Godoy J; *Philippines:* Gomez HS, Panelo AA; *Portugal:* Raposo JF; *Singapore:* Lee KO, Sum CF; *Spain:* Brotons-Cuixart C, de Teresa Parreno L, Farres-Fabre X; *Sweden:* Efendic S, Hänni A; *Switzerland:* Graf HJ; *Taiwan:* Hung Y-J, Hwu C-M; *Thailand:* Suwanwalaikom S, Vannasaeng S; *United States:* Adelizzi A, Angles LE, Brazg RL, Clower III JW, Cohen LM, Collins GV, Conard SE, Corder CN, DiMonte R, Gaudiani LM, Goldberg RB, Gollapudi MG, Hazan L, Helton DK, Hoekstra JA, Jacobs M, Kashyap ML, Lerman S, Lewin A, Littlejohn III T, Mitchell JR, Morin D, Pate DN, Peters Jr. PH, Raad GL, Rohlf J, Rosenstock J, Ruoff G, Schmeidler DA, Seidner M, Severance RJ, Shapiro JN, Sideropoulos HP, Soler NG, Soufer J, Thieneman AC, Tonkon MJ, Toth PD, van Cleeff M, Weerasinghe MU, Weissman PN, Whitehouse FR, Williams JB, Wombolt DG, Wysham C, Zimmerman RS.

**On-Line Table 1. Other fasting glyceic, meal tolerance test, and lipid efficacy endpoints**

| Parameter                                | N   | Baseline Mean (SD) | Week 24 Mean (SD) | LS Mean Change from Baseline (95% CI) |
|------------------------------------------|-----|--------------------|-------------------|---------------------------------------|
| <b>Other fasting glyceic parameters</b>  |     |                    |                   |                                       |
| Fasting serum proinsulin (pmol/L)        |     |                    |                   |                                       |
| Placebo                                  | 169 | 25.2 (20.8)        | 27.5 (25.3)       | 3.5 (-1.1, 8.1)                       |
| Sitagliptin 100 mg q.d.                  | 398 | 25.3 (25.8)        | 25.9 (30.3)       | 1.6 (-1.9, 5.2)                       |
| HOMA-IR                                  |     |                    |                   |                                       |
| Placebo                                  | 196 | 5.1 (3.5)          | 5.1 (3.2)         | 0.0 (-0.7, 0.7)                       |
| Sitagliptin 100 mg q.d.                  | 418 | 5.1 (4.4)          | 5.2 (5.5)         | 0.0 (-0.6, 0.6)                       |
| <b>Meal tolerance test parameters</b>    |     |                    |                   |                                       |
| 2-hour post-meal plasma glucose (mmol/L) |     |                    |                   |                                       |
| Placebo                                  | 182 | 15.1 (3.7)         | 14.6 (4.2)        | -0.6 (-1.2, -0.1)                     |
| Sitagliptin 100 mg q.d.                  | 387 | 15.2 (4.1)         | 11.9 (3.4)        | -3.4 (-3.9, -3.0)***                  |
| 2-hour post-meal insulin (pmol/L)        |     |                    |                   |                                       |
| Placebo                                  | 169 | 376.8 (258.6)      | 345.6 (278.4)     | -37.2 (-73.2, -1.2)                   |
| Sitagliptin 100 mg q.d.                  | 362 | 379.8 (283.8)      | 382.8 (273.0)     | -1.2 (-30.0, 27.6)*                   |
| 2-hour post-meal C-peptide (nmol/L)      |     |                    |                   |                                       |
| Placebo                                  | 176 | 2.4 (0.9)          | 2.4 (1.0)         | -0.0 (-0.2, 0.1)                      |
| Sitagliptin 100 mg q.d.                  | 375 | 2.4 (1.0)          | 2.6 (1.0)         | 0.2 (0.1, 0.3)***                     |
| Glucose AUC (mmol*hr/L)                  |     |                    |                   |                                       |
| Placebo                                  | 179 | 27.7 (5.7)         | 27.1 (6.7)        | -0.6 (-1.5, 0.4)                      |
| Sitagliptin 100 mg q.d.                  | 377 | 27.4 (6.3)         | 22.4 (5.4)        | -5.1 (-5.8, -4.4)***                  |
| Insulin AUC (pmol*hr/L)                  |     |                    |                   |                                       |
| Placebo                                  | 158 | 546.6 (337.2)      | 499.8 (309.0)     | -58.2 (-103.2, -13.8))                |
| Sitagliptin 100 mg q.d.                  | 319 | 561.0 (364.2)      | 572.4 (341.4)     | 7.2 (-28.8, 42.6)**                   |
| C-peptide AUC (nmol*hr/L)                |     |                    |                   |                                       |
| Placebo                                  | 176 | 3.5 (1.3)          | 3.5 (1.3)         | -0.0 (-0.2, 0.2)                      |
| Sitagliptin 100 mg q.d.                  | 360 | 3.4 (1.3)          | 3.8 (1.4)         | 0.3 (0.2, 0.5)***                     |
| Insulin AUC/glucose AUC ratio            |     |                    |                   |                                       |
| Placebo                                  | 155 | 20.8 (15.0)        | 20.0 (14.4)       | -1.1 (-3.1, 1.1)                      |
| Sitagliptin 100 mg q.d.                  | 308 | 22.1 (15.3)        | 27.2 (18.1)       | 5.2 (3.5, 6.9)***                     |

\*p<0.050 vs. placebo; \*\*p<0.010 vs. placebo; \*\*\*p<0.001 vs. placebo

To convert glucose from mmol/L to mg/dL, divide by 0.05551.

**On-Line Table 1. (cont.) Other fasting glycemc, meal tolerance test, and lipid efficacy endpoints**

| Parameter               | N   | Baseline Mean (SD) | Week 24 Mean (SD) | LS Mean Change <sup>†</sup> from Baseline (95% CI) |
|-------------------------|-----|--------------------|-------------------|----------------------------------------------------|
| <b>Lipid parameters</b> |     |                    |                   |                                                    |
| TC (mmol/L)             |     |                    |                   |                                                    |
| Placebo                 | 206 | 4.68 (0.98)        | 4.82 (0.98)       | 4.7 (2.1, 7.3)                                     |
| Sitagliptin 100 mg q.d. | 429 | 4.57 (0.92)        | 4.62 (0.97)       | 1.9 (-0.2, 3.9)*                                   |
| TG (mmol/L)             |     |                    |                   |                                                    |
| Placebo                 | 206 | 2.10 (1.44)        | 2.32 (1.86)       | 24.6 (16.8, 32.3)                                  |
| Sitagliptin 100 mg q.d. | 429 | 1.97 (1.13)        | 1.89 (1.09)       | 7.7 (1.5, 14.0)***                                 |
| HDL-C (mmol/L)          |     |                    |                   |                                                    |
| Placebo                 | 206 | 1.15 (0.28)        | 1.17 (0.30)       | -0.7 (-2.8, 1.4)                                   |
| Sitagliptin 100 mg q.d. | 429 | 1.17 (0.28)        | 1.20 (0.29)       | 1.3 (-0.4, 3.0)*                                   |
| LDL-C (mmol/L)          |     |                    |                   |                                                    |
| Placebo                 | 206 | 2.62 (0.81)        | 2.67 (0.84)       | 4.1 (-0.7, 8.9)                                    |
| Sitagliptin 100 mg q.d. | 429 | 2.53 (0.79)        | 2.58 (0.82)       | 3.3 (-0.6, 7.1)                                    |
| Non-HDL-C (mmol/L)      |     |                    |                   |                                                    |
| Placebo                 | 206 | 3.53 (1.00)        | 3.65 (1.00)       | 7.5 (3.9, 11.1)                                    |
| Sitagliptin 100 mg q.d. | 429 | 3.41 (0.91)        | 3.43 (0.96)       | 2.7 (-0.2, 5.6)**                                  |
| TG/HDL-C ratio          |     |                    |                   |                                                    |
| Placebo                 | 206 | 4.8 (4.9)          | 5.4 (6.3)         | 28.9 (20.0, 37.8)                                  |
| Sitagliptin 100 mg q.d. | 429 | 4.3 (3.4)          | 4.0 (3.2)         | 9.5 (2.3, 16.6)***                                 |

\*p<0.050 vs. placebo; \*\*p<0.010 vs. placebo; \*\*\*p<0.001 vs. placebo

<sup>†</sup>Results for lipid parameters (TC, TG, HDL-C, LDL-C, Non-HDL-C, and TG:HDL-C ratio) are expressed as LS mean percent change from baseline

**On-line Table 2. Clinical and Laboratory Adverse Experiences with Incidence  $\geq 2\%$**

| Safety Parameter                      | Placebo        | Sitagliptin 100 mg q.d. |
|---------------------------------------|----------------|-------------------------|
|                                       | N=237<br>n (%) | N=464<br>n (%)          |
| <b>Clinical Adverse Experiences</b>   |                |                         |
| Gastroenteritis                       | 5 (2.1)        | 4 (0.9)                 |
| Bronchitis                            | 6 (2.5)        | 13 (2.8)                |
| Influenza                             | 13 (5.5)       | 20 (4.3)                |
| Nasopharyngitis                       | 8 (3.4)        | 19 (4.1)                |
| Upper Respiratory Tract Infection     | 22 (9.3)       | 34 (7.3)                |
| Cough                                 | 4 (1.7)        | 14 (3.0)                |
| Urinary Tract Infection               | 3 (1.3)        | 11 (2.4)                |
| Blood Glucose Increased               | 6 (2.5)        | 3 (0.6)                 |
| Hyperglycaemia                        | 7 (3.0)        | 2 (0.4)                 |
| Arthralgia                            | 1 (0.4)        | 14 (3.0)                |
| Back Pain                             | 6 (2.5)        | 15 (3.2)                |
| Headache                              | 7 (3.0)        | 13 (2.8)                |
| Hypertension                          | 6 (2.5)        | 7 (1.5)                 |
|                                       |                |                         |
| <b>Laboratory Adverse Experiences</b> |                |                         |
| Fasting Blood Glucose Increased       | 10/230 (4.3)   | 1/459 (0.2)             |

Number of laboratory adverse experiences expressed as number of patients with laboratory adverse experience/ number of patients for whom the laboratory test was recorded postbaseline.

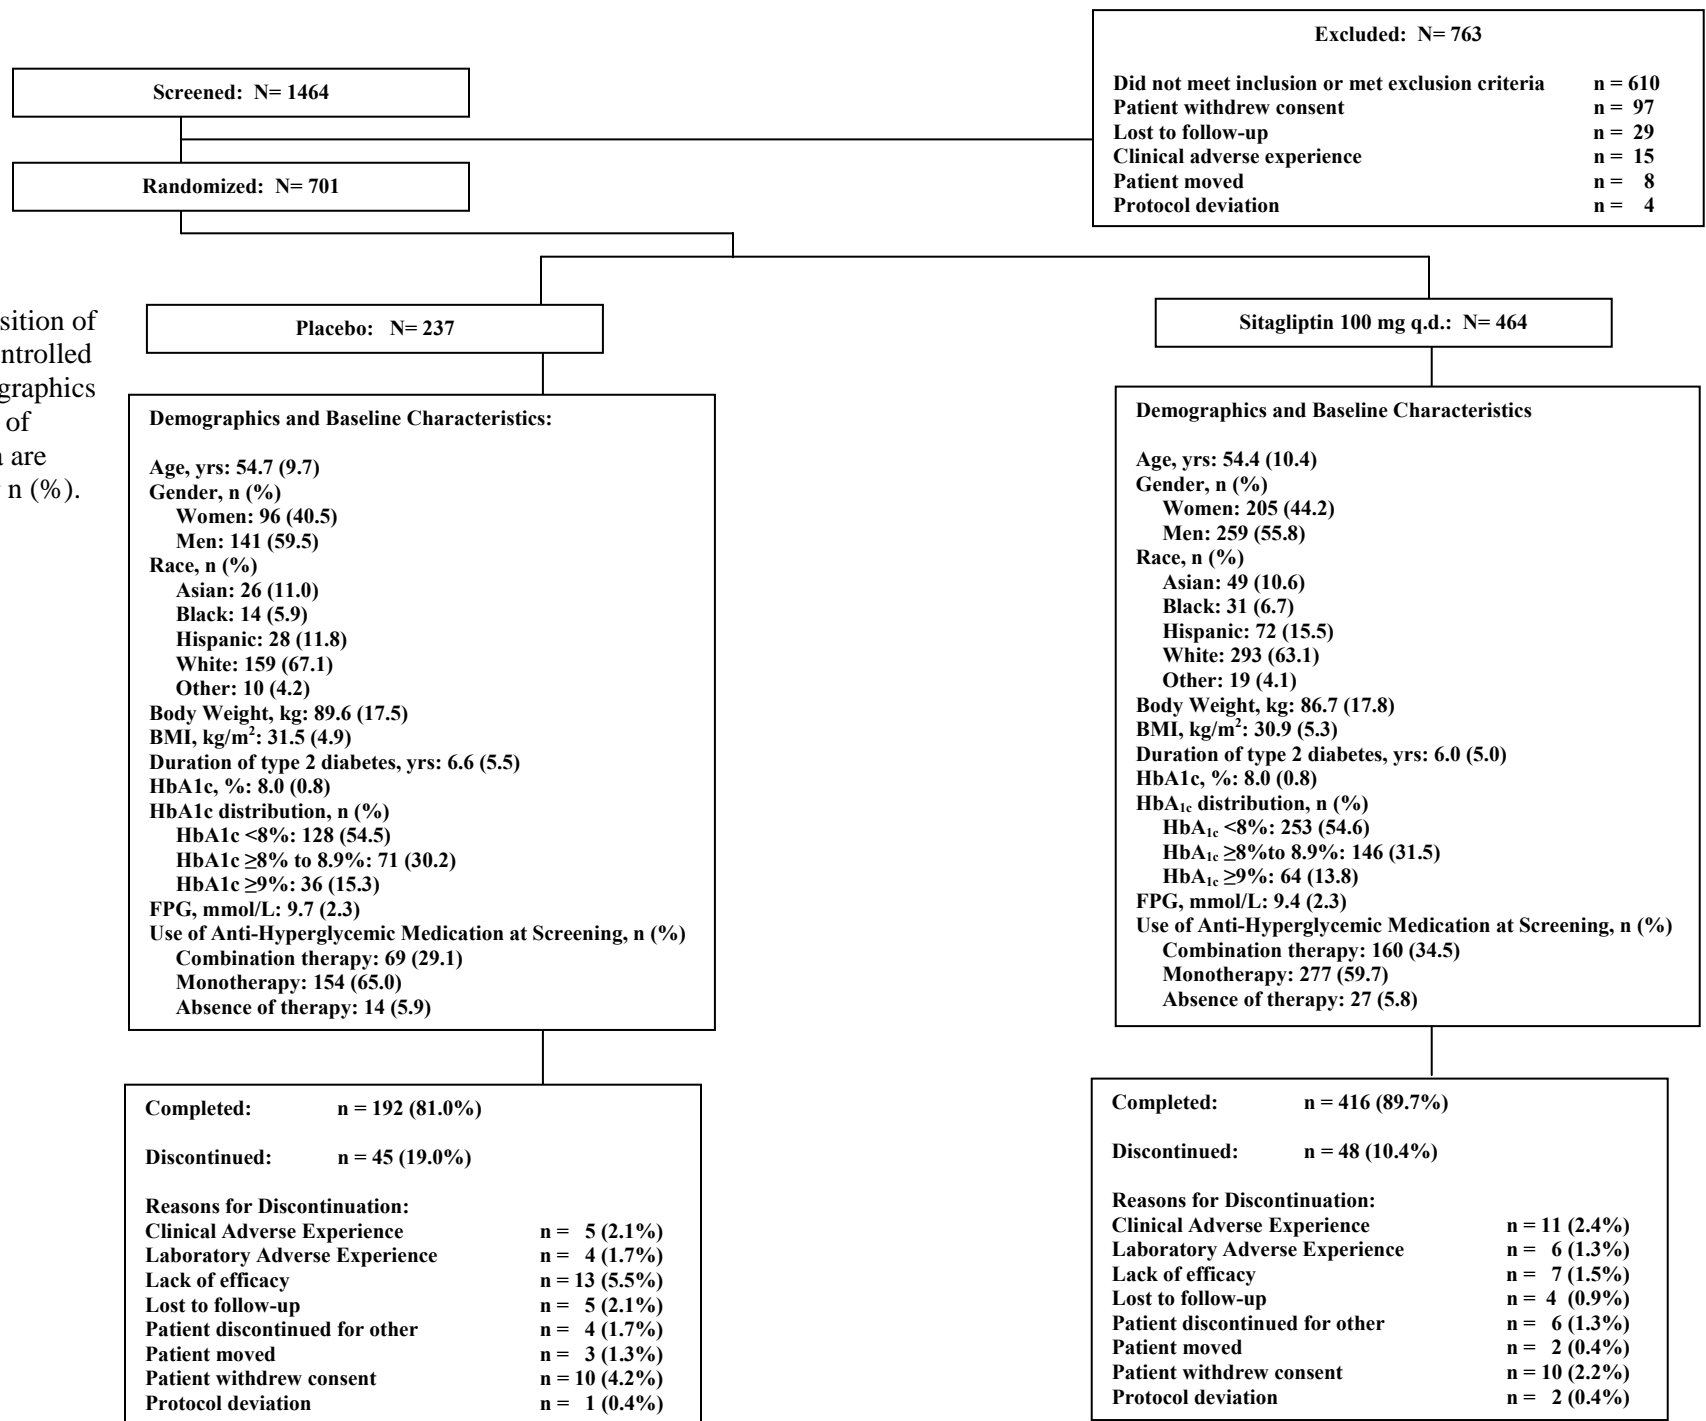

**On-Line Figure 1.** Disposition of patients for the placebo-controlled period, and baseline demographics and disease characteristics of randomized patients. Data are presented as mean (SD) or n (%).
